# Supplementary material for: Non-interventional study of the safety and effectiveness of fluticasone propionate/formoterol fumarate in real-world asthma management
Source: PubMed Central journal article supplement — Ther Adv Respir Dis. 2018 Sep 20;12:1753466618796987. doi: 10.1177/1753466618796987 (PMC6149027; doi:10.1177/1753466618796987), 2018-09-20
Supplement: Supplementary_data.pdf [file Supplementary_data.pdf]

**Supplementary Table 1. List of adverse events of special interest**

|                                                                              |                                                                                                                              |
|------------------------------------------------------------------------------|------------------------------------------------------------------------------------------------------------------------------|
| Respiratory adverse events including cough and paradoxical bronchospasm      | Skin atrophy                                                                                                                 |
| Asthma worsening/asthma exacerbation                                         | Skin contusion                                                                                                               |
| Serious asthma-related events (asthma hospitalisations, intubations, deaths) | Psychological or behavioural effects including psychomotor hyperactivity, sleep disorders, anxiety, depression or aggression |
| Local oral adverse events                                                    | Glaucoma                                                                                                                     |
| Local immunosuppressive effects, infections                                  | Hypokalaemia                                                                                                                 |
| Anaphylactic reactions                                                       | Hyperglycaemia / increased blood glucose                                                                                     |
| Adrenal suppression/adrenal failure                                          | Cardiac arrhythmias and QTc prolongation                                                                                     |
| Growth retardation                                                           | Cardiac ischaemia                                                                                                            |
| Decrease in bone mineral density                                             | Cataract                                                                                                                     |

**Supplementary Table 2. Lung function parameters**

| Parameter                              | Baseline<br>(n=2178–<br>2284) | Month 12<br>(n=1651–<br>1695) | End of study<br>(LOCF)<br>(n=2051–2125) | Change from baseline to end<br>of study (LOCF)<br>(n=1966–2043) |                 |
|----------------------------------------|-------------------------------|-------------------------------|-----------------------------------------|-----------------------------------------------------------------|-----------------|
|                                        | Mean (SD)                     | Mean (SD)                     | Mean (SD)                               | Mean (SD)                                                       | 95% CI          |
| FEV <sub>1</sub> (L)                   | 2.58 (0.86)                   | 2.71 (0.93)                   | 2.72 (0.93)                             | 0.13 (0.49)*                                                    | 0.110,<br>0.154 |
| FEV <sub>1</sub> predicted<br>(%)      | 84.9 (18.5)                   | 89.0 (19.7)                   | 88.8 (19.8)                             | 4.1 (16.2)*                                                     | 3.39, 4.81      |
| FVC (L)                                | 3.32 (1.09)                   | 3.41 (1.12)                   | 3.43 (1.12)                             | 0.10 (0.57)*                                                    | 0.076,<br>0.127 |
| FVC predicted<br>(%)                   | 91.7 (21.4)                   | 93.7 (18.8)                   | 93.9 (19.1)                             | 2.7 (16.1)*                                                     | 1.99, 3.40      |
| FEV <sub>1</sub> /FVC                  | 0.78 (0.12)                   | 0.80 (0.10)                   | 0.80 (0.12)                             | 0.01 (0.09)*                                                    | 0.009,<br>0.016 |
| FEV <sub>1</sub> /FVC<br>predicted (%) | 98.2 (14.9)                   | 100.1 (12.0)                  | 99.8 (15.3)                             | 1.7 (14.1)*                                                     | 1.03, 2.27      |
| PEF (L/min)                            | 356.1<br>(124.7)              | 373.5<br>(128.0)              | 377.0 (127.9)                           | 20.9 (77.4)*                                                    | 17.49,<br>24.25 |
| PEF predicted<br>(%)                   | 82.9 (32.2)                   | 88.2 (38.6)                   | 88.2 (35.8)                             | 4.8 (35.7)*                                                     | 3.24, 6.33      |

CI, confidence interval; LOCF, last observation carried forward, up to 12 months

\*  $p < 0.001$  (paired t-test)
